# Supplementary material for: Telephone based Interventions for Psychological Problems in Hospital Isolated Patients with COVID-19
Source: PubMed Central journal article supplement — Clin Psychopharmacol Neurosci. 2020 Nov 30;18(4):616–20. doi: 10.9758/cpn.2020.18.4.616 (PMC7609215; doi:10.9758/cpn.2020.18.4.616), 2020-11-30
Supplement: CPN-18-616_Supple.pdf [file CPN-18-616_Supple.pdf]

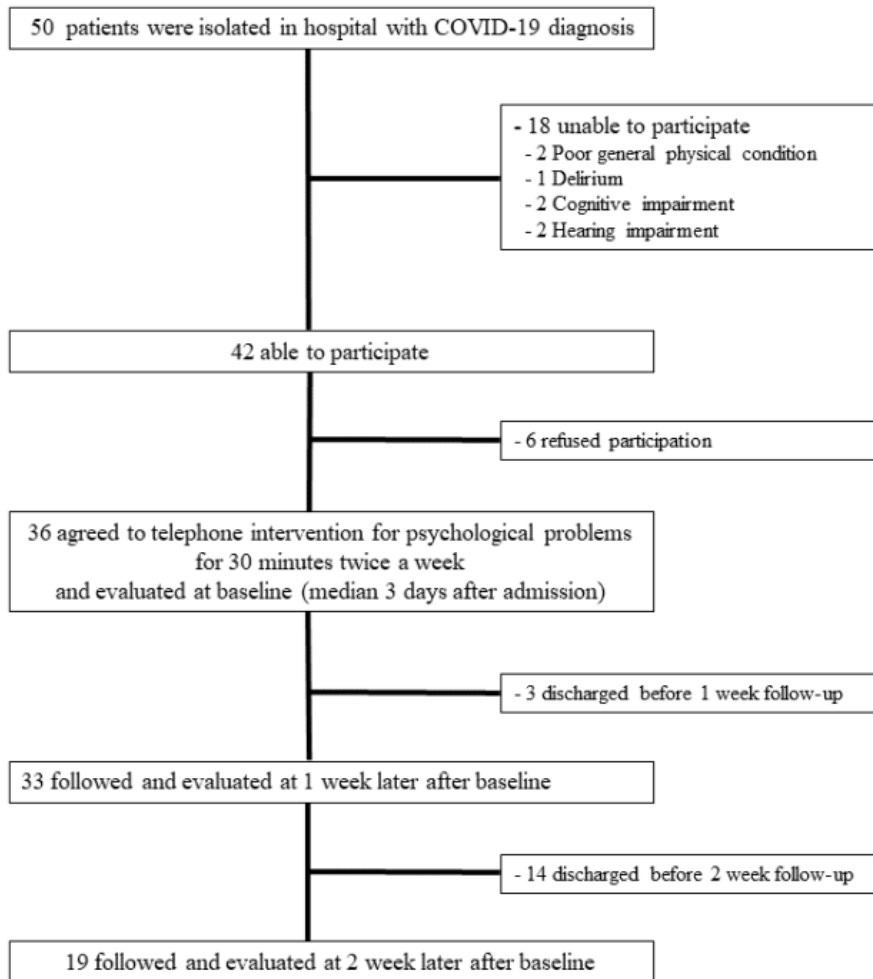

Supplementary Fig. 1. Flow chart of the study.

**Supplementary Table 1.** Characteristics of individual patients with COVID-19

| No | Total duration of admission (day) | Time to evaluation after admission (day) | Past psychiatric history | Prescribe psychotropic medication                                                  | HADS-A   |                | HADS-D   |                | ISI      |                | BDI item 9 |                |
|----|-----------------------------------|------------------------------------------|--------------------------|------------------------------------------------------------------------------------|----------|----------------|----------|----------------|----------|----------------|------------|----------------|
|    |                                   |                                          |                          |                                                                                    | Baseline | Last follow-up | Baseline | Last follow-up | Baseline | Last follow-up | Baseline   | Last follow-up |
| 1  | 36                                | 2                                        | None                     | Mirtazapine 15 mg,<br>Quetiapine 25 mg,<br>Clonazepam 0.5 mg<br>Mirtazapine 7.5 mg | 17       | 8              | 18       | 6              | 18       | 5              | 2          | 0              |
| 2  | 12                                | 3                                        | None                     |                                                                                    | 6        | 6              | 6        | 4              | 9        | 11             | 0          | 0              |
| 3  | 24                                | 11                                       | None                     |                                                                                    | 5        | 0              | 4        | 0              | 1        | 0              | 0          | 0              |
| 4  | 21                                | 3                                        | None                     |                                                                                    | 1        | 2              | 3        | 3              | 0        | 4              | 0          | 0              |
| 5  | 21                                | 3                                        | None                     |                                                                                    | 3        | 2              | 12       | 4              | 5        | 0              | 0          | 0              |
| 6  | 21                                | 3                                        | None                     |                                                                                    | 6        | 6              | 9        | 10             | 10       | 9              | 0          | 0              |
| 7  | 21                                | 5                                        | Insomnia                 |                                                                                    | 7        | 8              | 10       | 11             | 8        | 6              | 0          | 0              |
| 8  | 19                                | 3                                        | Insomnia                 |                                                                                    | 2        | 12             | 12       | 14             | 14       | 20             | 1          | 0              |
| 9  | 13                                | 4                                        | Depression               |                                                                                    | 6        | 8              | 12       | 12             | 0        | 15             | 1          | 0              |
| 10 | 16                                | 5                                        | None                     |                                                                                    | 2        | 0              | 2        | 1              | 2        | 2              | 0          | 0              |
| 11 | 18                                | 3                                        | None                     |                                                                                    | 7        | 11             | 5        | 7              | 12       | 13             | 0          | 0              |
| 12 | 18                                | 3                                        | None                     |                                                                                    | 8        | 6              | 4        | 5              | 12       | 5              | 0          | 0              |
| 13 | 11                                | 3                                        | None                     | Mirtazapine 7.5 mg                                                                 | 8        | 6              | 18       | 16             | 3        | 4              | 0          | 0              |
| 14 | 17                                | 3                                        | None                     |                                                                                    | 6        | 0              | 2        | 0              | 2        | 0              | 0          | 0              |
| 15 | 13                                | 3                                        | None                     |                                                                                    | 4        | 3              | 5        | 2              | 2        | 1              | 0          | 0              |
| 16 | 11                                | 1                                        | None                     |                                                                                    | 6        | 8              | 9        | 7              | 6        | 2              | 0          | 0              |
| 17 | 17                                | 6                                        | None                     | Lorazepam 0.5 mg                                                                   | 7        | 5              | 7        | 4              | 2        | 1              | 0          | 0              |
| 18 | 15                                | 5                                        | None                     | Lorazepam 0.5 mg                                                                   | 9        | 8              | 7        | 10             | 0        | 6              | 0          | 0              |
| 19 | 12                                | 3                                        | None                     |                                                                                    | 2        | 1              | 1        | 1              | 1        | 0              | 0          | 0              |
| 20 | 12                                | 4                                        | None                     |                                                                                    | 1        | 2              | 3        | 4              | 5        | 1              | 0          | 0              |
| 21 | 13                                | 3                                        | None                     |                                                                                    | 11       | 7              | 7        | 7              | 6        | 0              | 0          | 0              |
| 22 | 9                                 | 3                                        | None                     | Escitalopram 7.5 mg                                                                | 13       | 11             | 13       | 15             | 2        | 0              | 0          | 0              |
| 23 | 15                                | 2                                        | None                     | Mirtazapine 7.5 mg                                                                 | 4        | 1              | 16       | 9              | 1        | 3              | 0          | 0              |
| 24 | 14                                | 4                                        | None                     |                                                                                    | 7        | 7              | 7        | 8              | 9        | 10             | 0          | 0              |
| 25 | 34                                | 3                                        | None                     | Trazodone 25 mg                                                                    | 0        | 0              | 0        | 0              | 0        | 0              | 0          | 0              |
| 26 | 27                                | 6                                        | None                     | Escitalopram 5 mg,<br>alprazolam 0.25 mg                                           | 0        | 0              | 3        | 0              | 4        | 2              | 0          | 0              |
| 27 | 24                                | 3                                        | Panic disorder           |                                                                                    | 6        | 2              | 2        | 4              | 0        | 0              | 0          | 0              |
| 28 | 28                                | 3                                        | None                     |                                                                                    | 3        | 2              | 3        | 4              | 0        | 1              | 0          | 0              |
| 29 | 31                                | 17                                       | None                     |                                                                                    | 4        | 3              | 2        | 5              | 0        | 6              | 0          | 0              |
| 30 | 29                                | 3                                        | None                     |                                                                                    | 3        | 3              | 3        | 4              | 5        | 6              | 0          | 0              |
| 31 | 31                                | 4                                        | None                     |                                                                                    | 4        | 1              | 2        | 2              | 9        | 1              | 0          | 0              |
| 32 | 25                                | 4                                        | None                     |                                                                                    | 1        | 0              | 2        | 0              | 8        | 2              | 0          | 0              |
| 33 | 19                                | 5                                        | None                     |                                                                                    | 5        | 0              | 8        | 4              | 5        | 0              | 0          | 0              |

HADS-A, Hospital Anxiety and Depression Scale-anxiety subscale; HADS-D, Hospital Anxiety and Depression Scale-depression subscale; ISI, Insomnia Severity Index; BDI, Beck Depression Inventory.
